# Supplementary material
Source: PubMed Central journal article supplement (PMC2837416)
Supplement: NIHMS143760-supplement-03.pdf [file NIHMS143760-supplement-03.pdf]

**Group:**

- 1 Differentiation genes
- 2 Genes correlated to pluripotency
- 3 Genes involved in the maintenance of pluripotency

**Samples:**

- 1 Ant(-);bFGF(+)
- 2 Ant(+);bFGF(+)
- 3 Ant(+);bFGF(-)
- 4 Ant(-);bFGF(-)

| Group | Sample | Detector               | delta ct exp 1 | delta ct exp 2 | delta ct exp 3 |
|-------|--------|------------------------|----------------|----------------|----------------|
| 1     | 1      | ACTC-Hs00606316_m1     | 8.270004       | 8.071516       | 8.924715       |
| 1     | 1      | AFP-Hs00173490_m1      | 10.736845      | 10.091343      | 10.917534      |
| 1     | 1      | CD34-Hs00156373_m1     | 14.435814      | 12.81189       | 14.515696      |
| 1     | 1      | CDH5-Hs00174344_m1     | 15.651201      | 15.749922      | 16.84316       |
| 1     | 1      | CDX2-Hs00230919_m1     | 11.5304985     | 11.026041      | 11.985125      |
| 1     | 1      | CGB-Hs00361224_gH      | 11.548985      | 10.658838      | 11.6805935     |
| 1     | 1      | COL1A1-Hs00164004_m1   | 7.7808933      | 8.535362       | 8.177116       |
| 1     | 1      | DDX4-Hs00251859_m1     | 17.044184      | 16.987375      | 17.627756      |
| 1     | 1      | DES-Hs00157258_m1      | 11.897966      | 11.750553      | 12.111856      |
| 1     | 1      | EOMES-Hs00172872_m1    | 7.80764        | 9.494413       | 8.332354       |
| 1     | 1      | FLT1-Hs00176573_m1     | 9.199202       | 8.18289        | 9.958521       |
| 1     | 1      | FN1-Hs00277509_m1      | 4.349678       | 3.150093       | 4.554783       |
| 1     | 1      | FOXA2-Hs00232764_m1    | 8.5048065      | 9.009106       | 8.9646         |
| 1     | 1      | GATA4-Hs00171403_m1    | 9.392057       | 9.654871       | 9.573166       |
| 1     | 1      | GATA6-Hs00232018_m1    | 9.582731       | 10.149612      | 9.795666       |
| 1     | 1      | GFAP-Hs00157674_m1     | 13.875441      | 12.051243      | 13.576273      |
| 1     | 1      | HBZ-Hs00744391_s1      | 17.666025      | 15.225426      | 17.317076      |
| 1     | 1      | HLXB9-Hs00232128_m1    | 11.861193      | 12.693861      | 12.335241      |
| 1     | 1      | IAPP-Hs00169095_m1     | 13.464985      | 12.664972      | 14.060013      |
| 1     | 1      | ISL1-Hs00158126_m1     | 13.195557      | 13.775385      | 11.970312      |
| 1     | 1      | LAMA1-Hs00300550_m1    | 7.390335       | 7.358822       | 7.5080185      |
| 1     | 1      | LAMB1-Hs00158620_m1    | 5.4123383      | 5.083309       | 5.6123962      |
| 1     | 1      | LAMC1-Hs00267056_m1    | 5.252268       | 4.8025036      | 5.553856       |
| 1     | 1      | MYOD1-Hs00159528_m1    | 16.132383      | 15.644262      | 17.02049       |
| 1     | 1      | NES-Hs00707120_s1      | 5.900036       | 5.630684       | 5.9809055      |
| 1     | 1      | NEUROD1-Hs00159598_m1  | 13.584019      | 14.340923      | 15.253138      |
| 1     | 1      | NPPA-Hs00383230_g1     | 16.38774       | 18.797552      | 16.914335      |
| 1     | 1      | OLIG2-Hs00377820_m1    | 11.754919      | 12.2767315     | 13.178133      |
| 1     | 1      | PAX4-Hs00173014_m1     | 18.1368        | 18.94139       | 18.39187       |
| 1     | 1      | PAX6-Hs00240871_m1     | 9.461536       | 9.534494       | 9.775881       |
| 1     | 1      | PECAM1-Hs00169777_m1   | 15.703093      | 14.511341      | 15.727095      |
| 1     | 1      | PTF1A-Hs00603586_g1    | 18.476233      | 18.892313      | 19.239992      |
| 1     | 1      | RUNX2-Hs00231692_m1    | 13.348932      | 13.123936      | 14.192623      |
| 1     | 1      | SERPINA1-Hs00165475_m1 | 15.380175      | 15.5423565     | 16.221418      |

|   |                          |           |            |            |
|---|--------------------------|-----------|------------|------------|
| 1 | 1 SOX17-Hs00751752_s1    | 10.05051  | 10.127617  | 10.178951  |
| 1 | 1 SST-Hs00174949_m1      | 11.041954 | 11.243547  | 12.5570965 |
| 1 | 1 SYCP3-Hs00538143_m1    | 16.969229 | 15.714941  | 16.680262  |
| 1 | 1 SYP-Hs00300531_m1      | 11.201639 | 10.574081  | 11.438953  |
| 1 | 1 T-Hs00610080_m1        | 8.726309  | 9.907145   | 9.178326   |
| 1 | 1 TAT-Hs00356930_m1      | 16.900476 | 16.824373  | 18.143564  |
| 1 | 1 TH-Hs00165941_m1       | 11.759951 | 11.599878  | 12.646034  |
| 1 | 2 ACTC-Hs00606316_m1     | 7.754922  | 7.4032288  | 8.014792   |
| 1 | 2 AFP-Hs00173490_m1      | 14.884664 | 12.279079  | 17.554577  |
| 1 | 2 CD34-Hs00156373_m1     | 15.01508  | 13.023802  | 15.83565   |
| 1 | 2 CDH5-Hs00174344_m1     | 17.421604 | 19.371948  | 17.795708  |
| 1 | 2 CDX2-Hs00230919_m1     | 16.12444  | 15.513065  | 17.584965  |
| 1 | 2 CGB-Hs00361224_gH      | 12.813109 | 11.784071  | 12.151059  |
| 1 | 2 COL1A1-Hs00164004_m1   | 7.284631  | 8.318457   | 7.832013   |
| 1 | 2 COL2A1-Hs00156568_m1   | 12.929704 | 11.003159  | 13.118567  |
| 1 | 2 DDX4-Hs00251859_m1     | 19.67965  | 17.911259  | 18.62498   |
| 1 | 2 DES-Hs00157258_m1      | 12.98784  | 12.936674  | 12.522346  |
| 1 | 2 EOMES-Hs00172872_m1    | 10.586654 | 8.326782   | 12.904691  |
| 1 | 2 FLT1-Hs00176573_m1     | 9.860095  | 9.080219   | 9.1455965  |
| 1 | 2 FN1-Hs00277509_m1      | 5.210183  | 3.8203812  | 6.1170073  |
| 1 | 2 FOXA2-Hs00232764_m1    | 10.11485  | 8.842218   | 11.995528  |
| 1 | 2 GATA4-Hs00171403_m1    | 10.853065 | 9.822163   | 12.8692465 |
| 1 | 2 GATA6-Hs00232018_m1    | 11.175506 | 9.647928   | 13.604291  |
| 1 | 2 GFAP-Hs00157674_m1     | 13.064237 | 12.954561  | 12.891896  |
| 1 | 2 HBZ-Hs00744391_s1      | 18.173946 | 16.62946   | 17.568237  |
| 1 | 2 HLXB9-Hs00232128_m1    | 15.529584 | 13.791773  | 16.377846  |
| 1 | 2 IAPP-Hs00169095_m1     | 19.13734  | 17.84415   | 19.158283  |
| 1 | 2 ISL1-Hs00158126_m1     | 15.65244  | 13.607668  | 15.083941  |
| 1 | 2 LAMA1-Hs00300550_m1    | 9.228551  | 8.47674    | 9.111476   |
| 1 | 2 LAMB1-Hs00158620_m1    | 6.3581114 | 5.587221   | 5.9739523  |
| 1 | 2 LAMC1-Hs00267056_m1    | 5.9538107 | 5.354059   | 5.555133   |
| 1 | 2 MYOD1-Hs00159528_m1    | 19.419983 | 24.144703  | 20.707436  |
| 1 | 2 NES-Hs00707120_s1      | 6.9862146 | 6.3527584  | 6.8748045  |
| 1 | 2 NEUROD1-Hs00159598_m1  | 18.918053 | 19.338337  | 19.453682  |
| 1 | 2 NPPA-Hs00383230_g1     | 24.212925 | 18.59782   | 24.83107   |
| 1 | 2 OLIG2-Hs00377820_m1    | 14.514918 | 14.049446  | 14.160258  |
| 1 | 2 PAX4-Hs00173014_m1     | 20.695778 | 19.151249  | 20.778152  |
| 1 | 2 PAX6-Hs00240871_m1     | 14.064242 | 12.766115  | 16.464397  |
| 1 | 2 PECAM1-Hs00169777_m1   | 17.961357 | 16.70694   | 18.658325  |
| 1 | 2 PTF1A-Hs00603586_g1    | 16.168018 | 17.64981   | 16.335201  |
| 1 | 2 RUNX2-Hs00231692_m1    | 14.454185 | 14.3094635 | 15.582744  |
| 1 | 2 SERPINA1-Hs00165475_m1 | 17.770226 | 15.590738  | 18.044281  |
| 1 | 2 SOX17-Hs00751752_s1    | 11.694018 | 9.598652   | 14.568715  |
| 1 | 2 SST-Hs00174949_m1      | 17.53107  | 16.243122  | 19.97517   |
| 1 | 2 SYCP3-Hs00538143_m1    | 16.727272 | 16.102001  | 16.261917  |
| 1 | 2 SYP-Hs00300531_m1      | 11.999259 | 11.792799  | 12.454034  |
| 1 | 2 T-Hs00610080_m1        | 12.968825 | 10.605637  | 15.127736  |

|   |                          |            |           |           |
|---|--------------------------|------------|-----------|-----------|
| 1 | 2 TAT-Hs00356930_m1      | 17.930672  | 16.55885  | 17.915016 |
| 1 | 2 TH-Hs00165941_m1       | 20.038773  | 18.28566  | 20.379784 |
| 1 | 3 ACTC-Hs00606316_m1     | 7.698488   | 7.6748524 | 7.804944  |
| 1 | 3 AFP-Hs00173490_m1      | 14.766491  | 12.14308  | 13.882333 |
| 1 | 3 CD34-Hs00156373_m1     | 15.612003  | 13.769411 | 15.144107 |
| 1 | 3 CDH5-Hs00174344_m1     | 17.955608  | 17.087467 | 17.981209 |
| 1 | 3 CDX2-Hs00230919_m1     | 12.928326  | 11.337124 | 15.817668 |
| 1 | 3 CGB-Hs00361224_gH      | 12.267471  | 11.108356 | 12.127749 |
| 1 | 3 COL1A1-Hs00164004_m1   | 9.105944   | 8.918705  | 9.4184065 |
| 1 | 3 COL2A1-Hs00156568_m1   | 8.400942   | 7.406355  | 12.407292 |
| 1 | 3 DDX4-Hs00251859_m1     | 19.916214  | 17.428196 | 17.555676 |
| 1 | 3 DES-Hs00157258_m1      | 12.205013  | 11.787764 | 12.144666 |
| 1 | 3 EOMES-Hs00172872_m1    | 8.233519   | 7.984329  | 9.410632  |
| 1 | 3 FLT1-Hs00176573_m1     | 9.2418     | 8.937298  | 8.917436  |
| 1 | 3 FN1-Hs00277509_m1      | 4.686283   | 3.9465637 | 5.677518  |
| 1 | 3 FOXA2-Hs00232764_m1    | 9.559711   | 8.712585  | 10.692958 |
| 1 | 3 GATA4-Hs00171403_m1    | 9.716507   | 8.634581  | 10.964917 |
| 1 | 3 GATA6-Hs00232018_m1    | 10.21834   | 9.60261   | 11.803517 |
| 1 | 3 GFAP-Hs00157674_m1     | 13.346178  | 12.930721 | 13.619067 |
| 1 | 3 HBZ-Hs00744391_s1      | 18.957775  | 15.367111 | 18.529198 |
| 1 | 3 HLXB9-Hs00232128_m1    | 12.741926  | 11.747747 | 14.450063 |
| 1 | 3 IAPP-Hs00169095_m1     | 15.967667  | 14.650457 | 17.422855 |
| 1 | 3 ISL1-Hs00158126_m1     | 13.4621105 | 13.501114 | 13.99064  |
| 1 | 3 LAMA1-Hs00300550_m1    | 8.412596   | 7.734453  | 8.473506  |
| 1 | 3 LAMB1-Hs00158620_m1    | 5.774416   | 5.3347874 | 5.788743  |
| 1 | 3 LAMC1-Hs00267056_m1    | 5.3445168  | 5.296028  | 5.931079  |
| 1 | 3 MYOD1-Hs00159528_m1    | 16.96495   | 16.325222 | 19.081131 |
| 1 | 3 NES-Hs00707120_s1      | 6.2369175  | 6.1650352 | 6.7055845 |
| 1 | 3 NEUROD1-Hs00159598_m1  | 18.165531  | 15.435114 | 19.476341 |
| 1 | 3 NPPA-Hs00383230_g1     | 19.222672  | 16.617382 | 20.213219 |
| 1 | 3 OLIG2-Hs00377820_m1    | 14.01598   | 12.664579 | 15.094451 |
| 1 | 3 PAX4-Hs00173014_m1     | 19.639618  | 20.297573 | 19.010845 |
| 1 | 3 PAX6-Hs00240871_m1     | 12.670731  | 11.762558 | 14.053693 |
| 1 | 3 PECAM1-Hs00169777_m1   | 17.274063  | 15.4736   | 17.010502 |
| 1 | 3 PTF1A-Hs00603586_g1    | 18.601742  | 17.57014  | 18.236141 |
| 1 | 3 RUNX2-Hs00231692_m1    | 14.760197  | 13.296556 | 14.958333 |
| 1 | 3 SERPINA1-Hs00165475_m1 | 17.369602  | 17.364471 | 17.115833 |
| 1 | 3 SOX17-Hs00751752_s1    | 10.605158  | 9.420801  | 11.916474 |
| 1 | 3 SST-Hs00174949_m1      | 14.959637  | 13.273788 | 18.406975 |
| 1 | 3 SYCP3-Hs00538143_m1    | 17.030888  | 17.070728 | 16.818169 |
| 1 | 3 SYP-Hs00300531_m1      | 13.176878  | 12.436752 | 13.075797 |
| 1 | 3 T-Hs00610080_m1        | 9.756102   | 8.734428  | 10.903819 |
| 1 | 3 TAT-Hs00356930_m1      | 17.955666  | 17.421307 | 17.299267 |
| 1 | 3 TH-Hs00165941_m1       | 13.609423  | 12.700245 | 18.175056 |
| 1 | 4 ACTC-Hs00606316_m1     | 8.070229   | 7.775381  | 7.0455723 |
| 1 | 4 AFP-Hs00173490_m1      | 6.426489   | 6.0409393 | 6.206415  |
| 1 | 4 CD34-Hs00156373_m1     | 12.38796   | 12.294838 | 11.621334 |

|   |   |                        |           |            |            |
|---|---|------------------------|-----------|------------|------------|
| 1 | 4 | CDH5-Hs00174344_m1     | 14.781042 | 13.730841  | 12.4412    |
| 1 | 4 | CDX2-Hs00230919_m1     | 10.955046 | 10.7805    | 10.027     |
| 1 | 4 | CGB-Hs00361224_gH      | 10.113937 | 10.571049  | 10.416363  |
| 1 | 4 | COL1A1-Hs00164004_m1   | 9.094896  | 7.460047   | 6.2284355  |
| 1 | 4 | COL2A1-Hs00156568_m1   | 8.99988   | 8.468048   | 7.2782536  |
| 1 | 4 | DDX4-Hs00251859_m1     | 18.25613  | 18.001007  | 19.066587  |
| 1 | 4 | DES-Hs00157258_m1      | 11.26972  | 10.974068  | 11.071592  |
| 1 | 4 | EOMES-Hs00172872_m1    | 6.4995995 | 7.7992134  | 6.9949894  |
| 1 | 4 | FLT1-Hs00176573_m1     | 9.12178   | 8.582487   | 9.029995   |
| 1 | 4 | FN1-Hs00277509_m1      | 2.546938  | 3.104601   | 2.5346375  |
| 1 | 4 | FOXA2-Hs00232764_m1    | 7.536995  | 8.369034   | 8.088497   |
| 1 | 4 | GATA4-Hs00171403_m1    | 7.876766  | 8.48633    | 8.131899   |
| 1 | 4 | GATA6-Hs00232018_m1    | 7.780718  | 8.984234   | 8.245251   |
| 1 | 4 | GFAP-Hs00157674_m1     | 14.348934 | 12.746248  | 14.121153  |
| 1 | 4 | HBZ-Hs00744391_s1      | 17.302265 | 14.7920685 | 16.30396   |
| 1 | 4 | HLXB9-Hs00232128_m1    | 11.362656 | 11.626564  | 11.481499  |
| 1 | 4 | IAPP-Hs00169095_m1     | 16.81984  | 14.49017   | 13.717953  |
| 1 | 4 | ISL1-Hs00158126_m1     | 11.403641 | 12.359375  | 12.430532  |
| 1 | 4 | LAMA1-Hs00300550_m1    | 7.2192955 | 7.235384   | 6.8290615  |
| 1 | 4 | LAMB1-Hs00158620_m1    | 5.25012   | 5.070078   | 5.143938   |
| 1 | 4 | LAMC1-Hs00267056_m1    | 5.4942627 | 5.477068   | 5.402607   |
| 1 | 4 | MYOD1-Hs00159528_m1    | 15.614897 | 15.84791   | 15.079357  |
| 1 | 4 | NES-Hs00707120_s1      | 6.661804  | 6.5901337  | 6.0475388  |
| 1 | 4 | NEUROD1-Hs00159598_m1  | 17.51381  | 15.345024  | 14.751978  |
| 1 | 4 | NPPA-Hs00383230_g1     | 17.494682 | 17.697311  | 13.931126  |
| 1 | 4 | OLIG2-Hs00377820_m1    | 14.361248 | 13.35289   | 12.80756   |
| 1 | 4 | PAX4-Hs00173014_m1     | 20.268562 | 19.244164  | 18.50942   |
| 1 | 4 | PAX6-Hs00240871_m1     | 11.63888  | 11.644924  | 9.896971   |
| 1 | 4 | PECAM1-Hs00169777_m1   | 14.756294 | 13.390085  | 13.26297   |
| 1 | 4 | PTF1A-Hs00603586_g1    | 21.337795 | 21.45129   | 15.761515  |
| 1 | 4 | RUNX2-Hs00231692_m1    | 13.620512 | 13.219465  | 12.863926  |
| 1 | 4 | SERPINA1-Hs00165475_m1 | 13.185036 | 11.8190155 | 12.138016  |
| 1 | 4 | SOX17-Hs00751752_s1    | 8.276396  | 9.001291   | 8.445456   |
| 1 | 4 | SST-Hs00174949_m1      | 14.057926 | 12.583244  | 12.406427  |
| 1 | 4 | SYCP3-Hs00538143_m1    | 16.30972  | 16.76672   | 16.17864   |
| 1 | 4 | SYP-Hs00300531_m1      | 12.083588 | 11.809902  | 11.190855  |
| 1 | 4 | T-Hs00610080_m1        | 8.965904  | 9.421783   | 8.691715   |
| 1 | 4 | TAT-Hs00356930_m1      | 17.757454 | 17.652729  | 18.303755  |
| 1 | 4 | TH-Hs00165941_m1       | 16.188967 | 13.275574  | 12.331709  |
| 2 | 1 | BRIX-Hs00217848_m1     | 7.330473  | 6.631569   | 7.2374306  |
| 2 | 1 | CD9-Hs00233521_m1      | 5.523554  | 5.0245914  | 5.46233    |
| 2 | 1 | COL2A1-Hs00156568_m1   | 7.1453476 | 7.3765335  | 7.535658   |
| 2 | 1 | COMMD3-Hs00201350_m1   | 10.26343  | 10.051344  | 10.7443695 |
| 2 | 1 | CRABP2-Hs00275636_m1   | 3.0560951 | 2.8308372  | 3.9151363  |
| 2 | 1 | EBAF-Hs00745761_s1     | 9.246645  | 8.873724   | 9.217163   |
| 2 | 1 | FGF4-Hs00173564_m1     | 13.502655 | 13.794666  | 14.262335  |
| 2 | 1 | FOXD3-Hs00255287_s1    | 8.721155  | 8.123589   | 8.868296   |

|   |                         |           |            |           |
|---|-------------------------|-----------|------------|-----------|
| 2 | 1 GAL-Hs00544355_m1     | 5.956955  | 6.357914   | 6.5221977 |
| 2 | 1 GBX2-Hs00230965_m1    | 7.8125076 | 8.654245   | 8.459602  |
| 2 | 1 GRB7-Hs00917999_g1    | 7.7315445 | 6.860565   | 7.949404  |
| 2 | 1 IFITM1-Hs00705137_s1  | 2.2602158 | 1.7522697  | 2.7747498 |
| 2 | 1 IFITM2-Hs00829485_sH  | 5.496752  | 5.0695534  | 6.030367  |
| 2 | 1 IL6ST-Hs00174360_m1   | 8.985489  | 9.118046   | 9.471905  |
| 2 | 1 IMP2-Hs00538956_m1    | 6.2076626 | 5.344694   | 6.371786  |
| 2 | 1 KIT-Hs00174029_m1     | 7.847563  | 7.5205917  | 8.2680645 |
| 2 | 1 LEFTB-Hs00764128_s1   | 8.717346  | 9.148556   | 8.263468  |
| 2 | 1 LIFR-Hs00158730_m1    | 15.944571 | 14.229027  | 14.556339 |
| 2 | 1 LIN28-Hs00702808_s1   | 1.5198803 | 0.92993546 | 1.5689487 |
| 2 | 1 NODAL-Hs00415443_m1   | 6.81785   | 8.067982   | 6.8315716 |
| 2 | 1 NOG-Hs00271352_s1     | 10.365639 | 10.667929  | 10.609262 |
| 2 | 1 NR5A2-Hs00187067_m1   | 9.795689  | 9.589663   | 10.037836 |
| 2 | 1 NR6A1-Hs00265966_m1   | 5.3610725 | 5.635559   | 5.6753025 |
| 2 | 1 PODXL-Hs00193638_m1   | 3.3319492 | 3.2997932  | 3.8839378 |
| 2 | 1 PTEN-Hs00829813_s1    | 9.506378  | 8.463253   | 9.577211  |
| 2 | 1 REST-Hs00194498_m1    | 8.646357  | 8.699432   | 9.127062  |
| 2 | 1 SEMA3A-Hs00173810_m1  | 7.7100487 | 8.011923   | 8.046106  |
| 2 | 1 SFRP2-Hs00293258_m1   | 4.1377525 | 4.4318256  | 4.489403  |
| 2 | 1 TERT-Hs00162669_m1    | 9.927216  | 9.52858    | 10.204201 |
| 2 | 1 TFCP2L1-Hs00232708_m1 | 11.937431 | 10.638302  | 11.852373 |
| 2 | 1 UTF1-Hs00747497_g1    | 8.655764  | 7.7392635  | 9.461245  |
| 2 | 1 Xist-Hs01079824_m1    | 15.008677 | 13.5620365 | 15.975828 |
| 2 | 1 ZFP42-Hs00399279_m1   | 8.092361  | 7.6107063  | 8.112532  |
| 2 | 2 BRIX-Hs00217848_m1    | 7.24413   | 6.3247204  | 7.134366  |
| 2 | 2 CD9-Hs00233521_m1     | 5.661168  | 4.8515453  | 5.512458  |
| 2 | 2 COMMD3-Hs00201350_m1  | 11.814164 | 11.311958  | 11.459878 |
| 2 | 2 CRABP2-Hs00275636_m1  | 6.19847   | 4.952341   | 5.002639  |
| 2 | 2 EBAF-Hs00745761_s1    | 8.049779  | 5.694891   | 8.562905  |
| 2 | 2 FGF4-Hs00173564_m1    | 15.602498 | 14.215576  | 15.054753 |
| 2 | 2 FOXD3-Hs00255287_s1   | 7.3033495 | 7.2857018  | 7.7990026 |
| 2 | 2 GAL-Hs00544355_m1     | 6.3331957 | 5.5211143  | 6.9675455 |
| 2 | 2 GBX2-Hs00230965_m1    | 10.128221 | 10.718897  | 12.195329 |
| 2 | 2 GRB7-Hs00917999_g1    | 7.4195223 | 6.9465218  | 7.093047  |
| 2 | 2 IFITM1-Hs00705137_s1  | 3.1184263 | 2.264267   | 2.7844763 |
| 2 | 2 IFITM2-Hs00829485_sH  | 6.8712854 | 5.8004303  | 6.606904  |
| 2 | 2 IL6ST-Hs00174360_m1   | 10.372165 | 9.6282215  | 11.022044 |
| 2 | 2 IMP2-Hs00538956_m1    | 6.803931  | 6.026388   | 6.431714  |
| 2 | 2 KIT-Hs00174029_m1     | 9.323754  | 8.605528   | 9.285844  |
| 2 | 2 LEFTB-Hs00764128_s1   | 7.461814  | 5.115631   | 7.7136316 |
| 2 | 2 LIFR-Hs00158730_m1    | 13.963817 | 12.996136  | 17.89569  |
| 2 | 2 LIN28-Hs00702808_s1   | 2.6143522 | 1.813221   | 2.2115602 |
| 2 | 2 NODAL-Hs00415443_m1   | 6.252576  | 4.93894    | 7.065715  |
| 2 | 2 NOG-Hs00271352_s1     | 12.887778 | 11.054626  | 14.375741 |
| 2 | 2 NR5A2-Hs00187067_m1   | 10.005233 | 9.687653   | 10.649201 |
| 2 | 2 NR6A1-Hs00265966_m1   | 7.088414  | 6.4807186  | 6.7639933 |

|   |   |                       |           |            |            |
|---|---|-----------------------|-----------|------------|------------|
| 2 | 2 | PODXL-Hs00193638_m1   | 4.2740583 | 3.807455   | 3.8750448  |
| 2 | 2 | PTEN-Hs00829813_s1    | 9.333398  | 8.865635   | 10.157041  |
| 2 | 2 | REST-Hs00194498_m1    | 9.920091  | 9.466562   | 9.467925   |
| 2 | 2 | SEMA3A-Hs00173810_m1  | 8.791665  | 7.3449135  | 8.757476   |
| 2 | 2 | SFRP2-Hs00293258_m1   | 5.9958887 | 4.7963676  | 5.8231497  |
| 2 | 2 | TERT-Hs00162669_m1    | 11.299216 | 10.001543  | 10.578546  |
| 2 | 2 | TFCP2L1-Hs00232708_m1 | 10.731225 | 10.190388  | 10.871442  |
| 2 | 2 | UTF1-Hs00747497_g1    | 8.585805  | 8.483162   | 8.828187   |
| 2 | 2 | Xist-Hs01079824_m1    | 15.297269 | 14.6027355 | 15.0532675 |
| 2 | 2 | ZFP42-Hs00399279_m1   | 8.638806  | 7.3032284  | 8.457322   |
| 2 | 3 | BRIX-Hs00217848_m1    | 6.3877716 | 6.54805    | 6.7080107  |
| 2 | 3 | CD9-Hs00233521_m1     | 5.3641605 | 5.2872963  | 5.336808   |
| 2 | 3 | COMMD3-Hs00201350_m1  | 11.496515 | 10.828487  | 11.312116  |
| 2 | 3 | CRABP2-Hs00275636_m1  | 4.8480015 | 3.8655014  | 5.0636797  |
| 2 | 3 | EBAF-Hs00745761_s1    | 10.027487 | 9.138128   | 9.288243   |
| 2 | 3 | FGF4-Hs00173564_m1    | 14.457594 | 14.145632  | 14.569222  |
| 2 | 3 | FOXD3-Hs00255287_s1   | 8.034819  | 7.3957253  | 7.890483   |
| 2 | 3 | GAL-Hs00544355_m1     | 5.4150524 | 5.3283005  | 6.1879816  |
| 2 | 3 | GBX2-Hs00230965_m1    | 9.224159  | 9.966574   | 10.289399  |
| 2 | 3 | GRB7-Hs00917999_g1    | 6.802595  | 6.6707096  | 7.3667173  |
| 2 | 3 | IFITM1-Hs00705137_s1  | 2.1008568 | 1.4167519  | 2.5690012  |
| 2 | 3 | IFITM2-Hs00829485_sH  | 5.8087807 | 5.1449203  | 6.143653   |
| 2 | 3 | IL6ST-Hs00174360_m1   | 10.022186 | 9.653294   | 10.472594  |
| 2 | 3 | IMP2-Hs00538956_m1    | 6.1707    | 4.90024    | 6.5246305  |
| 2 | 3 | KIT-Hs00174029_m1     | 8.939196  | 8.347431   | 8.940585   |
| 2 | 3 | LEFTB-Hs00764128_s1   | 8.225685  | 7.574196   | 7.896533   |
| 2 | 3 | LIFR-Hs00158730_m1    | 16.00615  | 14.3415985 | 17.164566  |
| 2 | 3 | LIN28-Hs00702808_s1   | 1.9648952 | 1.5854034  | 1.9850874  |
| 2 | 3 | NODAL-Hs00415443_m1   | 5.82848   | 5.7901363  | 6.5600023  |
| 2 | 3 | NOG-Hs00271352_s1     | 12.191877 | 11.204407  | 13.609849  |
| 2 | 3 | NR5A2-Hs00187067_m1   | 9.573748  | 9.48637    | 9.637551   |
| 2 | 3 | NR6A1-Hs00265966_m1   | 6.4213276 | 6.392536   | 6.581918   |
| 2 | 3 | PODXL-Hs00193638_m1   | 3.9019585 | 3.5312939  | 3.9629126  |
| 2 | 3 | PTEN-Hs00829813_s1    | 9.421885  | 9.138313   | 9.850318   |
| 2 | 3 | REST-Hs00194498_m1    | 9.400297  | 8.970158   | 9.497672   |
| 2 | 3 | SEMA3A-Hs00173810_m1  | 8.114841  | 7.7072506  | 8.277261   |
| 2 | 3 | SFRP2-Hs00293258_m1   | 4.78438   | 4.536825   | 5.152175   |
| 2 | 3 | TERT-Hs00162669_m1    | 10.78331  | 10.114229  | 10.385112  |
| 2 | 3 | TFCP2L1-Hs00232708_m1 | 11.094782 | 10.445065  | 11.046691  |
| 2 | 3 | UTF1-Hs00747497_g1    | 9.260054  | 9.04833    | 9.330529   |
| 2 | 3 | Xist-Hs01079824_m1    | 15.415667 | 14.34347   | 15.788302  |
| 2 | 3 | ZFP42-Hs00399279_m1   | 6.554653  | 6.5758476  | 6.404668   |
| 2 | 4 | BRIX-Hs00217848_m1    | 6.6155777 | 6.5196323  | 6.5246525  |
| 2 | 4 | CD9-Hs00233521_m1     | 4.917574  | 5.3516827  | 5.201519   |
| 2 | 4 | COMMD3-Hs00201350_m1  | 10.832781 | 10.46788   | 10.06193   |
| 2 | 4 | CRABP2-Hs00275636_m1  | 4.3353004 | 3.3573074  | 3.222334   |
| 2 | 4 | EBAF-Hs00745761_s1    | 10.294886 | 10.502558  | 10.363483  |

|   |   |                       |           |            |            |
|---|---|-----------------------|-----------|------------|------------|
| 2 | 4 | FGF4-Hs00173564_m1    | 13.528267 | 13.3115635 | 13.103828  |
| 2 | 4 | FOXD3-Hs00255287_s1   | 8.38488   | 8.63887    | 8.39612    |
| 2 | 4 | GAL-Hs00544355_m1     | 5.4613113 | 6.0513515  | 5.569359   |
| 2 | 4 | GBX2-Hs00230965_m1    | 8.930206  | 9.668964   | 8.026739   |
| 2 | 4 | GRB7-Hs00917999_g1    | 7.6729164 | 6.928793   | 7.5445194  |
| 2 | 4 | IFITM1-Hs00705137_s1  | 2.224804  | 1.8622952  | 2.1599674  |
| 2 | 4 | IFITM2-Hs00829485_sH  | 5.3168144 | 5.467518   | 5.302273   |
| 2 | 4 | IL6ST-Hs00174360_m1   | 8.896376  | 8.568901   | 8.329905   |
| 2 | 4 | IMP2-Hs00538956_m1    | 6.6474037 | 5.568022   | 5.937044   |
| 2 | 4 | KIT-Hs00174029_m1     | 7.836149  | 8.00124    | 7.9085064  |
| 2 | 4 | LEFTB-Hs00764128_s1   | 7.5958996 | 8.495575   | 8.11982    |
| 2 | 4 | LIFR-Hs00158730_m1    | 11.699884 | 13.090597  | 13.060486  |
| 2 | 4 | LIN28-Hs00702808_s1   | 1.7223587 | 1.1329918  | 1.534277   |
| 2 | 4 | NODAL-Hs00415443_m1   | 6.5349903 | 6.754633   | 6.395075   |
| 2 | 4 | NOG-Hs00271352_s1     | 11.010441 | 11.1537895 | 10.462038  |
| 2 | 4 | NR5A2-Hs00187067_m1   | 9.916025  | 9.9795265  | 9.8901825  |
| 2 | 4 | NR6A1-Hs00265966_m1   | 5.5830193 | 5.4195557  | 5.5888824  |
| 2 | 4 | PODXL-Hs00193638_m1   | 3.7402763 | 3.5036297  | 3.5952282  |
| 2 | 4 | PTEN-Hs00829813_s1    | 9.781803  | 9.024754   | 8.935322   |
| 2 | 4 | REST-Hs00194498_m1    | 9.463671  | 9.131153   | 9.222023   |
| 2 | 4 | SEMA3A-Hs00173810_m1  | 7.4328003 | 7.8712616  | 7.559      |
| 2 | 4 | SFRP2-Hs00293258_m1   | 4.189417  | 4.6784687  | 4.5535736  |
| 2 | 4 | TERT-Hs00162669_m1    | 10.215645 | 9.842598   | 10.23259   |
| 2 | 4 | TFCP2L1-Hs00232708_m1 | 11.564995 | 11.055618  | 11.6373825 |
| 2 | 4 | UTF1-Hs00747497_g1    | 10.3484   | 8.686739   | 8.821062   |
| 2 | 4 | Xist-Hs01079824_m1    | 16.72187  | 14.674978  | 15.391283  |
| 2 | 4 | ZFP42-Hs00399279_m1   | 7.9675903 | 7.7949123  | 8.215143   |
| 3 | 1 | DNMT3B-Hs00171876_m1  | 3.341051  | 2.8118992  | 3.4344406  |
| 3 | 1 | GABRB3-Hs00241459_m1  | 5.7876015 | 5.55616    | 6.124378   |
| 3 | 1 | GDF3-Hs00220998_m1    | 8.000185  | 8.764572   | 8.626259   |
| 3 | 1 | Nanog*-Hs02387400_g1  | 5.576128  | 5.2050285  | 5.790201   |
| 3 | 1 | POU5F1-Hs00742896_s1  | 8.05052   | 8.464413   | 9.603638   |
| 3 | 1 | SOX2-Hs00602736_s1    | 7.8542194 | 7.332653   | 8.205547   |
| 3 | 1 | TDGF1-Hs02339499_g1   | 5.6434975 | 4.420849   | 5.379223   |
| 3 | 2 | DNMT3B-Hs00171876_m1  | 3.5921621 | 2.599556   | 2.8742895  |
| 3 | 2 | GABRB3-Hs00241459_m1  | 6.299575  | 5.906332   | 6.1623297  |
| 3 | 2 | GDF3-Hs00220998_m1    | 10.190074 | 8.483831   | 10.446088  |
| 3 | 2 | Nanog*-Hs02387400_g1  | 4.7901087 | 4.0627728  | 4.749528   |
| 3 | 2 | POU5F1-Hs00742896_s1  | 8.936715  | 7.200144   | 7.886258   |
| 3 | 2 | SOX2-Hs00602736_s1    | 9.174354  | 8.185217   | 8.606576   |
| 3 | 2 | TDGF1-Hs02339499_g1   | 4.64828   | 3.569746   | 4.5931063  |
| 3 | 3 | DNMT3B-Hs00171876_m1  | 3.0816536 | 2.6902542  | 2.8365698  |
| 3 | 3 | GABRB3-Hs00241459_m1  | 5.7696285 | 5.4866886  | 5.96947    |
| 3 | 3 | GDF3-Hs00220998_m1    | 7.7536163 | 7.6233673  | 8.324746   |
| 3 | 3 | Nanog*-Hs02387400_g1  | 4.4519367 | 3.744646   | 4.7848177  |
| 3 | 3 | POU5F1-Hs00742896_s1  | 7.995735  | 7.2315655  | 8.282138   |
| 3 | 3 | SOX2-Hs00602736_s1    | 8.558119  | 7.463463   | 8.282256   |

|   |                        |           |           |           |
|---|------------------------|-----------|-----------|-----------|
| 3 | 3 TDGF1-Hs02339499_g1  | 4.7641716 | 3.751852  | 4.7028074 |
| 3 | 4 DNMT3B-Hs00171876_m1 | 3.0967789 | 2.5322514 | 3.2662983 |
| 3 | 4 GABRB3-Hs00241459_m1 | 5.542631  | 6.0078754 | 5.830179  |
| 3 | 4 GDF3-Hs00220998_m1   | 6.894331  | 7.6703453 | 7.08477   |
| 3 | 4 Nanog*-Hs02387400_g1 | 5.127327  | 4.9505405 | 5.1373844 |
| 3 | 4 POU5F1-Hs00742896_s1 | 8.818459  | 8.54051   | 8.477934  |
| 3 | 4 SOX2-Hs00602736_s1   | 8.672863  | 7.8711433 | 8.179039  |
| 3 | 4 TDGF1-Hs02339499_g1  | 4.588274  | 4.420809  | 4.8527813 |
