# Supplementary material
Source: PubMed Central journal article supplement (PMC2837416)

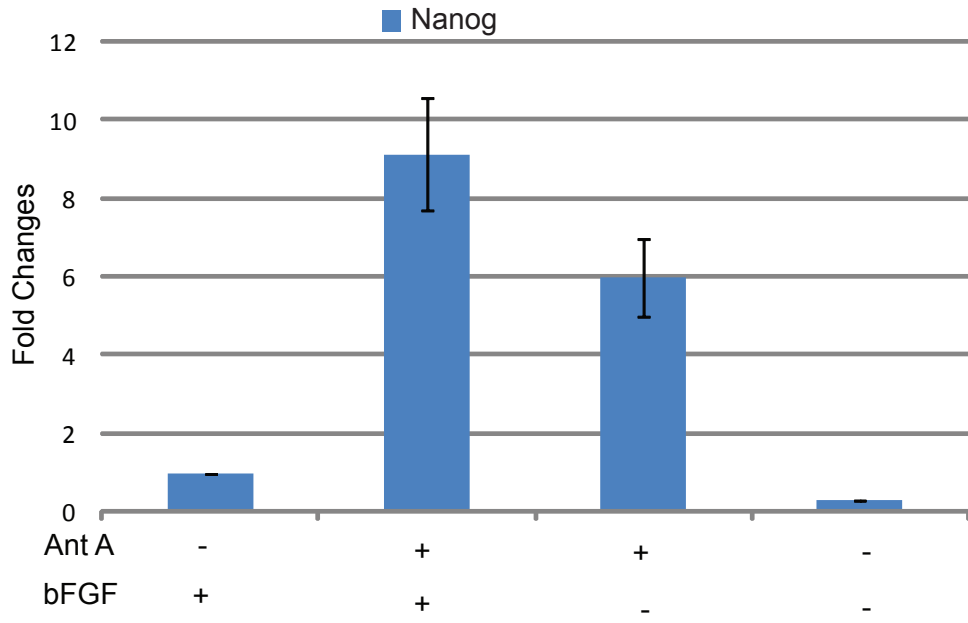

Supplement: NIHMS143760-supplement-01.pdf [file NIHMS143760-supplement-01.pdf]

**a**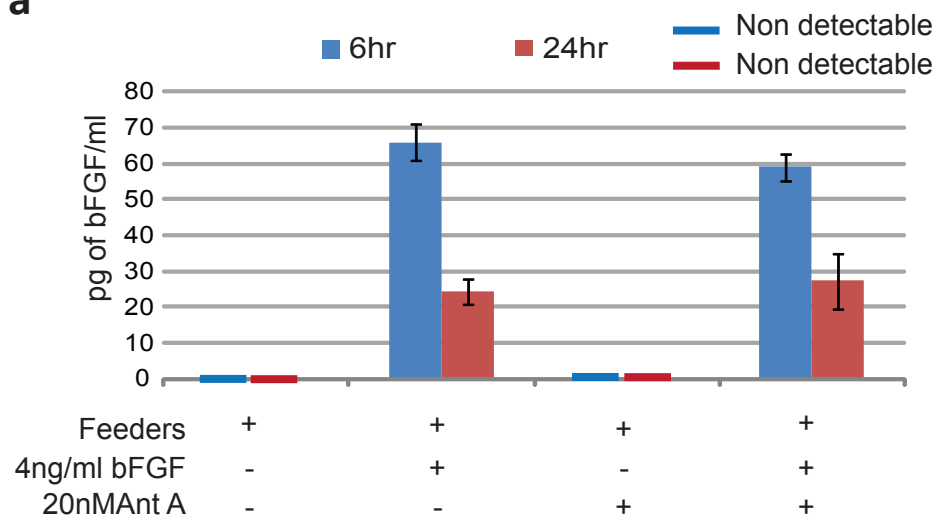**b**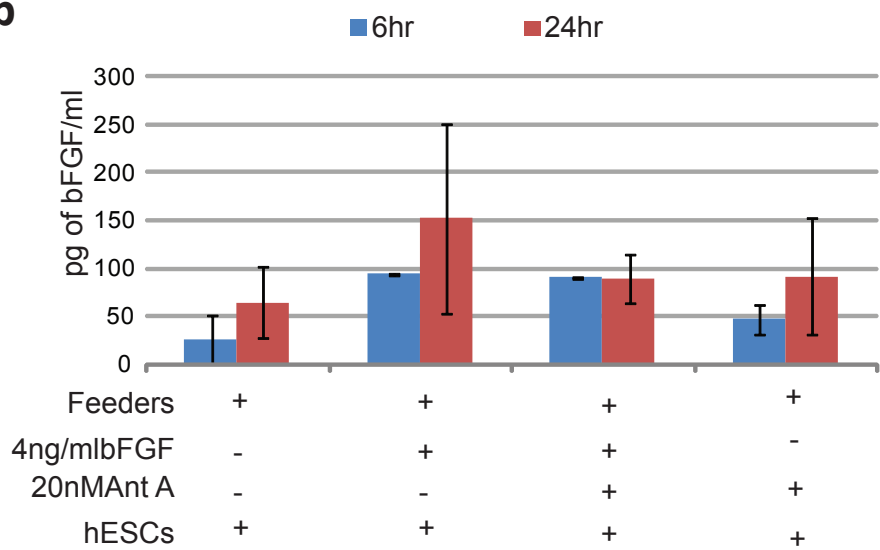

Supplement: NIHMS143760-supplement-02.pdf [file NIHMS143760-supplement-02.pdf]
